# Supplementary material for: Analysis Transcriptome and Phytohormone Changes Associated with the Allelopathic Effects of Ginseng Hairy Roots Induced by Different-Polarity Ginsenoside Components
Source: MDPI journal article supplement (doi:10.3390/molecules29081877), 2024-04-19
Supplement: s1 [file s1]

**Table S1** The composition and contents of ginsenosides in ginseng fractions with different polarity.

| Ginsenosides       | Type | $t_R$ | $[M-H]^-$<br>( $m/z$ ) | Standard Curve                          | Content (mg/g) |         |        |
|--------------------|------|-------|------------------------|-----------------------------------------|----------------|---------|--------|
|                    |      |       |                        |                                         | ZG50           | ZG70    | ZG100  |
| NotoR <sub>1</sub> | PPT  | 5.29  | 931.51                 | $y=1064.9x+44782$ , $R^2=0.9996$        | 0.07           | 0       | 0      |
| Re                 | PPT  | 6.24  | 945.58                 | $y=1119.4x+212959$ , $R^2=0.9999$       | 0.81           | 0.18    | 0.08   |
| Rg <sub>1</sub>    | PPT  | 6.58  | 799.30                 | $y=175.04x+129853$ , $R^2=0.9991$       | 0.68           | 0.11    | 0.05   |
| Rf                 | PPT  | 12.83 | 799.51                 | $y=3243.4x+1492004.5$ , $R^2=0.9990$    | 0              | 0.58    | 0.03   |
| Rb <sub>1</sub>    | PPD  | 14.50 | 1107.73                | $y=1222915.4x+914658.6$ , $R^2=0.9990$  | 0.06           | 1.39    | 0.11   |
| NotoR <sub>2</sub> | PPT  | 14.90 | 769.48                 | $y=696.98x-67079$ , $R^2=0.9998$        | 0              | 0.64    | 0.03   |
| Ro                 | OLE  | 15.30 | 955.32                 | $y=2425.1x-14893$ , $R^2=0.9994$        | 0.52           | 0.09    | 0.06   |
| Rg <sub>2</sub>    | PPT  | 15.36 | 783.54                 | $y=5249.1x-7583.1$ , $R^2=0.9986$       | 0              | 0.13    | 0      |
| Rc                 | PPD  | 15.74 | 1077.68                | $y=1311.1x+1681931.9$ , $R^2=0.9953$    | 0.01           | 0.92    | 0.06   |
| Rb <sub>3</sub>    | PPD  | 15.89 | 1077.34                | $y=1045244.7x+18750.1$ , $R^2=0.9996$   | 0              | 0.39    | 0.02   |
| Rh <sub>1</sub>    | PPT  | 16.45 | 683.49                 | $y=3719.8x-695.04$ , $R^2=0.9992$       | 0              | 0.0004  | 0.0002 |
| Rb <sub>2</sub>    | PPD  | 17.03 | 1077.75                | $y=1349.6x+979755$ , $R^2=0.9992$       | 0.01           | 1.29    | 0.07   |
| Rd                 | PPD  | 19.38 | 945.60                 | $y=1644956.7x+1417481.6$ , $R^2=0.9988$ | 0              | 0.63    | 0.05   |
| Rg <sub>3</sub>    | PPD  | 20.90 | 783.31                 | $y=10852.9x-207220.7$ , $R^2=0.9960$    | 0.0004         | 0.0007  | 0.0009 |
| F <sub>2</sub>     | PPD  | 20.93 | 783.34                 | $y=26842x-20104$ , $R^2=0.9905$         | 0.00002        | 0.00006 | 0.0003 |

**Table S2** The 109 endogenous phytohormones and their metabolites detected by LC-MS/MS.

| No. | Phytohormones                                                 | Class | LLOQ | ULOQ  | RT   | Equation                 | r      |
|-----|---------------------------------------------------------------|-------|------|-------|------|--------------------------|--------|
| 1   | Absciscic acid (ABA)                                          | ABA   | 0.1  | 500   | 5.31 | $y=0.1011x+2.4879e^{-4}$ | 0.9987 |
| 2   | ABA-glucosyl ester (ABA-GE)                                   | ABA   | 5    | 500   | 4.49 | $y=0.4310x+0.0069$       | 0.9996 |
| 3   | Absciscic aldehyde (ABA-ald)                                  | ABA   | 5    | 500   | 5.54 | $y=0.0199x-9.7725e^{-5}$ | 0.9986 |
| 4   | Indole-3-carboxylic Acid (ICA)                                | Auxin | 0.5  | 500   | 4.78 | $y=0.0099x+5.6203e^{-4}$ | 0.9997 |
| 5   | Indole-3-carboxaldehyde (ICAlD)                               | Auxin | 0.1  | 500   | 4.93 | $y=0.0438x+0.0381$       | 0.9959 |
| 6   | 3-Indolebutyric acid (IBA)                                    | Auxin | 0.2  | 500   | 5.79 | $y=0.0234x+0.1355$       | 0.9999 |
| 7   | Indole-3-acetic acid (IAA)                                    | Auxin | 0.2  | 500   | 5.05 | $y=0.0142x+5.8495e^{-4}$ | 0.9999 |
| 8   | 1-O-indol-3-ylacetylglucose (IAA-Glc)                         | Auxin | 5    | 10000 | 4.41 | $y=0.1570x-0.0036$       | 0.9964 |
| 9   | Indoleacetyl glutamic acid (IAA-Glu)                          | Auxin | 0.1  | 500   | 4.41 | $y=0.1570x-0.0036$       | 0.9964 |
| 10  | 3-Indoleacetonitrile (IAN)                                    | Auxin | 0.5  | 500   | 4.30 | $y=0.0041x+0.0017$       | 0.9955 |
| 11  | Indole-3-acetyl glycine (IAA-Gly)                             | Auxin | 1    | 500   | 4.44 | $y=0.2916x+0.0191$       | 0.9999 |
| 12  | 2-oxindole-3-acetic acid (OxIAA)                              | Auxin | 1    | 500   | 4.24 | $y=0.0112x+5.4380e^{-4}$ | 0.9995 |
| 13  | Indole-3-acetyl-L-aspartic acid (IAA-Asp)                     | Auxin | 0.1  | 500   | 4.30 | $y=0.0183x+2.1655e^{-4}$ | 0.9992 |
| 14  | N-(3-Indolylacetyl)-L-leucine (IAA-Leu)                       | Auxin | 0.1  | 500   | 5.79 | $y=0.9413x+0.0290$       | 0.9997 |
| 15  | N-(3-Indolylacetyl)-L-valine (IAA-Val)                        | Auxin | 0.1  | 500   | 5.42 | $y=0.7679x+0.0011$       | 0.9998 |
| 16  | Indole-3-acetyl-L-tryptophan (IAA-Trp)                        | Auxin | 0.1  | 500   | 5.75 | $y=0.3439x+0.0034$       | 0.9999 |
| 17  | N-(3-Indolylacetyl)-L-alanine (IAA-Ala)                       | Auxin | 0.1  | 500   | 4.74 | $y=0.2700x+0.0063$       | 0.9997 |
| 18  | N-(3-Indolylacetyl)-L-phenylalanine (IAA-Phe)                 | Auxin | 0.5  | 500   | 5.87 | $y=0.5974x+0.0082$       | 0.9981 |
| 19  | Indole-3-acetyl-L-glutamic acid dimethyl ester (IAA-Glu-diMe) | Auxin | 0.5  | 500   | 5.59 | $y=0.0416x-5.3100e^{-4}$ | 0.9983 |
| 20  | Indole-3-acetyl-L-leucine methyl ester (IAA-Leu-Me)           | Auxin | 0.1  | 500   | 6.48 | $y=2.0010x+0.0208$       | 0.9957 |
| 21  | Indole-3-acetyl-L-valine methyl ester (IAA-Val-Me)            | Auxin | 0.1  | 500   | 6.15 | $y=1.9089x+0.0185$       | 0.9998 |
| 22  | Indole-3-acetyl-L-phenylalanine methyl ester (IAA-Phe-Me)     | Auxin | 0.1  | 500   | 6.52 | $y=1.2831x+0.0091$       | 0.9995 |
| 23  | 3-Indoleacetamide (IAM)                                       | Auxin | 0.1  | 500   | 4.34 | $y=0.4887x+0.0084$       | 0.9966 |
| 24  | Tryptamine (TRA)                                              | Auxin | 0.1  | 500   | 3.63 | $y=0.1381x+0.0068$       | 0.9988 |
| 25  | Indole-3-lactic acid (ILA)                                    | Auxin | 2    | 500   | 4.65 | $y=0.0170x+0.0017$       | 0.9990 |
| 26  | 3-Indoleacrylic acid (IA)                                     | Auxin | 0.2  | 500   | 5.27 | $y=0.0136x+5.9659e^{-4}$ | 0.9990 |
| 27  | L-tryptophan (TRP)                                            | Auxin | 2    | 10000 | 3.35 | $y=0.0066x+0.0060$       | 0.9992 |
| 28  | Methyl indole-3-acetate (MEIAA)                               | Auxin | 0.2  | 500   | 6.12 | $y=0.0775x+0.0013$       | 0.9915 |
| 29  | 3-Indolepropionic acid (IPA)                                  | Auxin | 0.1  | 500   | 5.48 | $y=0.0395x+0.0010$       | 0.9995 |
| 30  | Indole                                                        | Auxin | 0.5  | 500   | N/A  | $y=0.0048x+0.0032$       | 0.9992 |
| 31  | N6-isopentenyladenine (IP)                                    | CK    | 0.1  | 500   | 4.14 | $y=0.0701x+0.0078$       | 0.9967 |
| 32  | trans-Zeatin (tZ)                                             | CK    | 0.1  | 500   | 3.06 | $y=0.1707x+0.0031$       | 0.9996 |
| 33  | cis-Zeatin (cZ)                                               | CK    | 0.1  | 500   | 3.26 | $y=0.0752x+0.0017$       | 0.9998 |
| 34  | Dihydrozeatin (DZ)                                            | CK    | 0.1  | 500   | 3.18 | $y=0.0756x+0.0014$       | 0.9993 |

|    |                                                                        |    |     |     |      |                           |        |
|----|------------------------------------------------------------------------|----|-----|-----|------|---------------------------|--------|
| 35 | Dihydrozeatin ribonucleoside (DHZR)                                    | CK | 0.1 | 500 | 3.63 | $y=0.0819x+0.0013$        | 0.9904 |
| 36 | cis-Zeatin riboside (cZR)                                              | CK | 0.1 | 500 | 3.70 | $y=0.1016x+7.5735e^{-4}$  | 0.9905 |
| 37 | cis-Zeatin-9-glucoside (cZ9G)                                          | CK | 0.1 | 500 | 3.32 | $y=0.4104x+0.0025$        | 0.9904 |
| 38 | N6-Isopentenyl-adenine-9-glucoside (iP9G)                              | CK | 0.1 | 500 | 4.11 | $y=0.2335x+0.0037$        | 0.9927 |
| 39 | N6-Isopentenyl-adenine-7-glucoside (iP7G)                              | CK | 0.1 | 500 | 3.72 | $y=0.4002x+0.0040$        | 0.9921 |
| 40 | trans-Zeatin-O-glucoside (tZOG)                                        | CK | 0.2 | 500 | 2.92 | $y=0.1019x-1.3589e^{-4}$  | 0.9995 |
| 41 | Dihydrozeatin-O-glucoside riboside (DHZROG)                            | CK | 0.1 | 500 | 3.52 | $y=0.3861x+0.0035$        | 0.9998 |
| 42 | cis-Zeatin-O-glucoside riboside (cZROG)                                | CK | 0.1 | 500 | 3.54 | $y=0.0237x+1.7623e^{-4}$  | 0.9967 |
| 43 | 4-[[[(9-beta-D-Glucopyranosyl-9H-purin-6-yl)amino]methyl]phenol (pT9G) | CK | 0.1 | 500 | 3.59 | $y=0.1443x+0.0012$        | 0.9931 |
| 44 | 2-Chloro-trans-zeatin (2ClZ)                                           | CK | 0.1 | 500 | 4.45 | $y=0.1209x+2.1126e^{-4}$  | 0.9989 |
| 45 | para-Topolin (pT)                                                      | CK | 0.2 | 500 | 3.57 | $y=0.0622x+0.0016$        | 0.9980 |
| 46 | meta-Topolin (mT)                                                      | CK | 2   | 500 | 3.74 | $y=0.1035x+0.0012$        | 0.9909 |
| 47 | meta-Topolin riboside (mTR)                                            | CK | 0.1 | 500 | 4.11 | $y=0.2736x+0.0029$        | 0.9900 |
| 48 | ortho-Topolin (oT)                                                     | CK | 0.1 | 500 | 4.16 | $y=0.1806x+0.0020$        | 0.9901 |
| 49 | 6-Benzyladenine (BAP)                                                  | CK | 0.1 | 500 | 4.33 | $y=0.1751x+0.0040$        | 0.9919 |
| 50 | 6-Benzyladenosine (BAPR)                                               | CK | 0.1 | 500 | 4.68 | $y=0.4545x+0.0039$        | 0.9915 |
| 51 | Kinetin (K)                                                            | CK | 0.1 | 500 | 3.82 | $y=0.0815x+0.0014$        | 0.9953 |
| 52 | Kinetin riboside (KR)                                                  | CK | 0.1 | 500 | 4.25 | $y=0.2748x+0.0042$        | 0.9906 |
| 53 | para-Topolin riboside (pTR)                                            | CK | 0.1 | 500 | 3.97 | $y=0.1858x+0.0031$        | 0.9907 |
| 54 | ortho-Topolin riboside (oTR)                                           | CK | 0.1 | 500 | 4.49 | $y=0.1799x+0.0017$        | 0.9911 |
| 55 | meta-Topolin-9-glucoside (mT9G)                                        | CK | 0.1 | 500 | 3.75 | $y=0.1487x+0.0022$        | 0.9907 |
| 56 | ortho-Topolin-9-glucoside (oT9G)                                       | CK | 0.1 | 500 | 4.12 | $y=0.1170x+5.5352e^{-4}$  | 0.9910 |
| 57 | N6-Benzyladenine -9-glucoside (BAP9G)                                  | CK | 0.1 | 500 | 4.28 | $y=0.3662x+0.0033$        | 0.9906 |
| 58 | N6-Benzyladenine-7-glucoside (BAP7G)                                   | CK | 0.1 | 500 | 3.82 | $y=0.4782x+0.0071$        | 0.9904 |
| 59 | Kinetin-9-glucoside (K9G)                                              | CK | 0.1 | 500 | 3.83 | $y=0.2378x+0.0037$        | 0.9920 |
| 60 | 2-Methylthio-N6-isopentenyladenine (2MeSiP)                            | CK | 0.1 | 500 | 5.90 | $y=0.0226x+5.4621e^{-4}$  | 0.9900 |
| 61 | 2-methylthio-cis-zeatin (2MeScZ)                                       | CK | 0.1 | 500 | 4.54 | $y=0.0204x+4.02684e^{-4}$ | 0.9922 |
| 62 | 2-Methylthio-cis-zeatin riboside (2MeScZR)                             | CK | 0.1 | 500 | 4.60 | $y=0.1306x+0.0033$        | 0.9921 |
| 63 | 2-Methylthio-N6-isopentenyladenosine (2MeSiPR)                         | CK | 0.1 | 500 | 5.79 | $y=0.0269x-3.8687e^{-5}$  | 0.9908 |
| 64 | N6-isopentenyladenosine (IPR)                                          | CK | 0.1 | 500 | 4.54 | $y=0.0860x+0.0012$        | 0.9906 |
| 65 | trans-Zeatin riboside (tZR)                                            | CK | 0.1 | 500 | 3.61 | $y=0.1534x+0.0019$        | 0.9957 |
| 66 | Dihydrozeatin-7-glucoside (DHZ7G)                                      | CK | 0.1 | 500 | 3.20 | $y=0.3791x+0.0018$        | 0.9934 |
| 67 | cis-Zeatin riboside monophosphate (cZRMP)                              | CK | 2   | 500 | 3.02 | $y=0.0457x-0.0011$        | 0.9983 |
| 68 | N-6-iso-pentenyladenosine-5'-monophosphate (iPRMP)                     | CK | 1   | 500 | 3.83 | $y=0.1100x-6.2032e^{-4}$  | 0.9974 |
| 69 | trans-Zeatin-9-glucoside (tZ9G)                                        | CK | 1   | 500 | 3.19 | $y=0.0758x+0.0045$        | 0.9990 |
| 70 | 9-Ribosyl-trans-zeatin 5'-monophosphate (tZRMP)                        | CK | 2   | 500 | 2.41 | $y=0.0293x-5.2890e^{-4}$  | 0.9950 |

|     |                                                              |     |     |       |      |                          |        |
|-----|--------------------------------------------------------------|-----|-----|-------|------|--------------------------|--------|
| 71  | 1-Aminocyclopropanecarboxylic acid (ACC)                     | ETH | 1   | 500   | 0.72 | $y=1.7969e^4x+2.6108e^4$ | 0.9959 |
| 72  | Gibberellin A1 (GA1)                                         | GA  | 2   | 500   | 4.49 | $y=0.0216x+0.0147$       | 0.9937 |
| 73  | Gibberellin A3 (GA3)                                         | GA  | 1   | 500   | 4.46 | $y=0.0634x+0.0049$       | 0.9974 |
| 74  | Gibberellin A4 (GA4)                                         | GA  | 2   | 500   | 6.19 | $y=0.0270x+0.0070$       | 0.9914 |
| 75  | Gibberellin A7 (GA7)                                         | GA  | 1   | 500   | 6.11 | $y=0.2677x+0.0234$       | 0.9977 |
| 76  | Gibberellin A9 (GA9)                                         | GA  | 2   | 500   | 6.91 | $y=0.0679x+0.0056$       | 0.9913 |
| 77  | Gibberellin A15 (GA15)                                       | GA  | 2   | 500   | 6.91 | $y=0.0221x+0.0011$       | 0.9948 |
| 78  | Gibberellin A19 (GA19)                                       | GA  | 5   | 500   | 5.17 | $y=0.0294x+0.0092$       | 0.9955 |
| 79  | Gibberellin A20 (GA20)                                       | GA  | 2   | 500   | 5.37 | $y=0.0176x+0.0025$       | 0.9940 |
| 80  | Gibberellin A24 (GA24)                                       | GA  | 2   | 500   | 6.37 | $y=0.0526x+0.0015$       | 0.9941 |
| 81  | Gibberellin A53 (GA53)                                       | GA  | 2   | 500   | 5.76 | $y=0.0400x+0.0153$       | 0.9997 |
| 82  | Gibberellin A44 (GA44)                                       | GA  | 5   | 500   | 5.41 | $y=0.0216x+9.0282e^{-4}$ | 0.9936 |
| 83  | Gibberellin A8 (GA8)                                         | GA  | 2   | 500   | 3.83 | $y=0.0978x+0.0035$       | 0.9953 |
| 84  | Gibberellin A5 (GA5)                                         | GA  | 5   | 500   | 5.30 | $y=0.0330x+0.0041$       | 0.9987 |
| 85  | Gibberellin A6 (GA6)                                         | GA  | 1   | 500   | 4.90 | $y=0.0797x+0.0039$       | 0.9962 |
| 86  | Gibberellin A29 (GA29)                                       | GA  | 2   | 500   | 3.99 | $y=0.0042x+0.0031$       | 0.9964 |
| 87  | Gibberellin A34 (GA34)                                       | GA  | 2   | 500   | 5.57 | $y=0.0838x+0.0025$       | 0.9980 |
| 88  | Gibberellin A51 (GA51)                                       | GA  | 5   | 500   | 5.71 | $y=0.0138x+0.0053$       | 0.9901 |
| 89  | Gibberellin A12 aldehyde (GA12-ald)                          | GA  | 5   | 500   | 7.76 | $y=0.0230x+0.0015$       | 0.9958 |
| 90  | Jasmonic Acid (JA)                                           | JA  | 0.2 | 500   | 5.83 | $y=0.0267x+0.0014$       | 0.9967 |
| 91  | Methyl jasmonate (MEJA)                                      | JA  | 0.2 | 500   | 6.96 | $y=0.4514x+0.0137$       | 0.9999 |
| 92  | Dihydrojasmonic acid (H2JA)                                  | JA  | 1   | 10000 | 6.20 | $y=0.0360x+0.0059$       | 0.9993 |
| 93  | Jasmonoyl-L-isoleucine (JA-ILE)                              | JA  | 0.1 | 500   | 6.37 | $y=0.0600x+0.0012$       | 0.9922 |
| 94  | cis(+)-12-Oxophytodienoic acid (OPDA)                        | JA  | 0.1 | 500   | 7.30 | $y=0.3276x+0.0122$       | 0.9984 |
| 95  | N-[-Jasmonoyl]-(l)-phenalanine (JA-Phe)                      | JA  | 0.1 | 500   | 6.41 | $y=0.1445x+0.0029$       | 0.9984 |
| 96  | N-[-Jasmonoyl]-(L)-valine (JA-Val)                           | JA  | 0.1 | 500   | 6.03 | $y=0.2704x+0.0040$       | 0.9902 |
| 97  | 3-oxo-2-(2-(Z)-Pentenyl)cyclopentane-1-butyric acid (OPC-4)  | JA  | 2   | 500   | 6.44 | $y=0.0143x+0.0169$       | 0.9931 |
| 98  | 3-oxo-2-(2-(Z)-Pentenyl)cyclopentane-1-hexanoic acid (OPC-6) | JA  | 5   | 500   | 7.06 | $y=0.0225x+0.0161$       | 0.9966 |
| 99  | 12-Hydroxyjasmonic acid (12-OH-JA)                           | JA  | 5   | 500   | 4.81 | $y=0.0342x+0.0442$       | 0.9976 |
| 100 | Jasmonate-1-aminocyclopropane-1-carboxylic acid (JA-ACC)     | JA  | 0.5 | 500   | 5.37 | $y=0.0459x+0.0017$       | 0.9904 |
| 101 | Melatonin (MLT)                                              | MLT | 0.5 | 500   | 4.90 | $y=9.0017e^5x+1.3671e^4$ | 0.9931 |
| 102 | Salicylic Acid (SA)                                          | SA  | 0.5 | 500   | 5.10 | $y=0.1037x+0.0207$       | 0.9997 |
| 103 | Salicylic acid 2-O-β-Glucoside (SAG)                         | SA  | 1   | 10000 | 3.59 | $y=0.0309x+0.0092$       | 0.9926 |
| 104 | L-Phenylalanine (Phe)                                        | SA  | 1   | 15000 | 2.00 | $y=718.2031x+2.0048e^4$  | 0.9919 |
| 105 | trans-Cinnamic acid (t-CA)                                   | SA  | 200 | 10000 | 5.59 | $y=235.6716x+920.8265$   | 0.9990 |
| 106 | 2-Coumarate                                                  | SA  | 10  | 500   | 4.90 | $y=6.3798e^4x+1.6791e^4$ | 0.9986 |

|     |                                                        |    |    |       |      |                           |        |
|-----|--------------------------------------------------------|----|----|-------|------|---------------------------|--------|
| 107 | 2-Methoxycarbonylphenyl beta-D-glucopyranoside (MeSAG) | SA | 20 | 500   | 4.17 | $y=3.8563e^4x+2.3844 e^4$ | 0.9995 |
| 108 | 5-Deoxystrigol (5DS)                                   | SL | 2  | 10000 | 7.54 | $y=6.2364e^3x+832.0683$   | 0.9990 |
| 109 | (±)Strigol (ST)                                        | SL | 20 | 10000 | 6.42 | $y=579.6571x+207.0285$    | 0.9970 |

---

**Table S3** The content of 52 endogenous phytohormones and their metabolites detected by LC-MS/MS.

| Index    | N | <b>M ± SE (ng/g)</b> |                  |                  |
|----------|---|----------------------|------------------|------------------|
|          |   | <b>CK</b>            | <b>ZG70</b>      | <b>ZG50</b>      |
| 12-OH-JA | 3 | 32.578±1.265         | 32.840±2.148     | 48.749±3.087     |
| 2MeScZR  | 3 | 0.137±0.009          | 0.348±0.0129     | 0.136±0.009      |
| ABA      | 3 | 1.521± 0.069         | 1.389±0.079      | 1.284±0.105      |
| ABA-ald  | 3 | 41.911±0.756         | 56.436±3.843     | 45.895±4.832     |
| ABA-GE   | 3 | 0.491±0.023          | 0.384±0.042      | 0.472±0.049      |
| ACC      | 3 | 48.349±1.554         | 45.939±1.744     | 40.287±3.799     |
| BAPR     | 3 | 0.272±0.024          | 0.255±0.021      | 0.219±0.026      |
| cZ       | 3 | 0.019±0.005          | 0.170±0.004      | 0                |
| cZ9G     | 3 | 0.072±0.007          | 0                | 0                |
| cZR      | 3 | 3.167±0.064          | 4.043±0.156      | 2.228±0.011      |
| cZRMP    | 3 | 1.681±0.035          | 4.168±0.085      | 1.604±0.105      |
| DHZR     | 3 | 0.110±0.023          | 0.116±0.012      | 0.096±0.024      |
| DHZROG   | 3 | 0.131±0.021          | 0.204±0.028      | 0.146±0.009      |
| GA1      | 3 | 3.432±0.776          | 3.881±1.012      | 0                |
| GA12-ald | 3 | 0                    | 0.499±0.024      | 0.344±0.020      |
| GA15     | 3 | 3.349±0.236          | 5.404±0.099      | 3.134±0.270      |
| GA19     | 3 | 4.254±0.409          | 3.513±0.151      | 4.230±0.303      |
| GA29     | 3 | 53.917±5.104         | 52.062±4.892     | 54.352±1.483     |
| GA53     | 3 | 0.628±0.068          | 0.875±0.149      | 0.464±0.126      |
| GA7      | 3 | 0                    | 0.020±0.008      | 0.014±0.001      |
| GA8      | 3 | 4.863±0.168          | 5.037±0.168      | 5.161±0.293      |
| IAA      | 3 | 29.208±0.236         | 42.622±1.245     | 28.703±1.456     |
| IAA-Asp  | 3 | 237.820±9.239        | 280.040±5.529    | 227.340±23.144   |
| IAA-Glc  | 3 | 3.322±0.058          | 3.380±0.773      | 5.978±0.748      |
| IAA-Glu  | 3 | 1.764±0.140          | 2.185±0.170      | 2.343±0.522      |
| IAA-Phe  | 3 | 0.285±0.018          | 0.475±0.039      | 0.282±0.030      |
| IAA-Trp  | 3 | 0.529±0.054          | 0.701±0.036      | 0.534±0.043      |
| IAM      | 3 | 0.253±0.035          | 0.747±0.082      | 0.375±0.076      |
| IAN      | 3 | 0.644±0.088          | 0.617±0.078      | 0.471±0.046      |
| ICA      | 3 | 1.606±0.180          | 3.938±0.118      | 2.416±0.271      |
| ICAla    | 3 | 5.611±0.422          | 6.851±0.809      | 6.805±0.354      |
| ILA      | 3 | 0.984±0.016          | 0.769±0.073      | 0                |
| Indole   | 3 | 1689.300±49.286      | 1502.400±116.150 | 1763.100±166.810 |
| IP       | 3 | 0.129±0.008          | 0.180±0.011      | 0.154±0.013      |

|        |   |                   |                   |                   |
|--------|---|-------------------|-------------------|-------------------|
| IPR    | 3 | 0.233±0.010       | 0.248±0.014       | 0.243±0.026       |
| iPRMP  | 3 | 0.669±0.018       | 1.097±0.073       | 0.933±0.034       |
| JA     | 3 | 8.983±0.428       | 9.986±0.153       | 8.742±0.709       |
| JA-ILE | 3 | 7.395±0.322       | 13.615±0.117      | 6.367±0.310       |
| JA-Val | 3 | 0.136±0.002       | 0.262±0.012       | 0.120±0.012       |
| KR     | 3 | 0.330±0.037       | 0.467±0.033       | 0.536±0.027       |
| MEIAA  | 3 | 2.713±0.093       | 2.536±0.060       | 2.401±0.054       |
| OPC-6  | 3 | 44.584±1.748      | 139.500±14.321    | 106.720±9.946     |
| OPDA   | 3 | 2.165±0.142       | 0                 | 2.998±0.024       |
| oT9G   | 3 | 0.102±0.020       | 0                 | 0                 |
| OxIAA  | 3 | 217.360±2.195     | 315.220±17.316    | 270.34±20.702     |
| Phe    | 3 | 2998.100±73.567   | 3656.200±109.220  | 2889.100±66.487   |
| pT9G   | 3 | 0                 | 0.661±0.053       | 0.988±0.063       |
| SA     | 3 | 25.125±1.622      | 38.755±0.759      | 27.774±2.776      |
| SAG    | 3 | 1281.400±78.424   | 3476.300±107.350  | 2527.600±26.568   |
| TRA    | 3 | 0.251±0.025       | 0.229±0.043       | 0.227±0.012       |
| TRP    | 3 | 12777.000±154.380 | 11312.000±327.710 | 10825.000±120.720 |
| tZRMP  | 3 | 1.406±0.071       | 1.730±0.072       | 1.233±0.137       |

---

**Table S4** The qPCR validation of 12 key genes data.

| Gene            | Group | Mean Expression (2- $\Delta\Delta C_t$ ) | STDEV | Primer sequence (5' to 3') | Product size (bp) |
|-----------------|-------|------------------------------------------|-------|----------------------------|-------------------|
| <i>TRIT1</i>    | CK    | 1.000                                    | 0.005 | TGTTGCACTACATGATTGATGATCC  | 91                |
|                 | ZG70  | 0.399                                    | 0.032 | TGTGCATAACAAACAAAGTCTGAAC  |                   |
| <i>cisZOG</i>   | CK    | 1.003                                    | 0.091 | ATTTTCATCGCCCACATCCGT      | 184               |
|                 | ZG70  | 0.647                                    | 0.074 | ACGATACCAAGACAACGCCA       |                   |
| <i>CPS</i>      | CK    | 1.004                                    | 0.112 | GCTGTTGTCCCATCCTCACT       | 174               |
|                 | ZG70  | 0.697                                    | 0.036 | GAGTCGCATAGCACCAGTTG       |                   |
| <i>CYP71A13</i> | CK    | 1.004                                    | 0.107 | CAAGACCTCCTGAGCTGCC        | 118               |
|                 | ZG70  | 0.185                                    | 0.029 | ATTACCGCATCGCTCACTCC       |                   |
| <i>CYP83B1</i>  | CK    | 1.001                                    | 0.058 | GGGATTAGCATGGGAGTTGCT      | 127               |
|                 | ZG70  | 0.397                                    | 0.010 | AGGTTAGACCAGGCAGTGAG       |                   |
| <i>DAO</i>      | CK    | 1.001                                    | 0.060 | ATCTACGCCCAAGCTCTCCA       | 195               |
|                 | ZG70  | 0.366                                    | 0.026 | TATCCAGCGGTGCCACTCTA       |                   |
| <i>GST</i>      | CK    | 1.004                                    | 0.107 | AGCCAAATTCATGCGGTCTG       | 101               |
|                 | ZG70  | 1.532                                    | 0.178 | GGAAGCCCGGAACAAAGAAAC      |                   |
| <i>GID1</i>     | CK    | 1.002                                    | 0.077 | TCTCTTTCTGTCATGCTCTCCA     | 190               |
|                 | ZG50  | 0.458                                    | 0.021 | TTCCAGTACCTTGTATGCCTGT     |                   |
| <i>GA20ox</i>   | CK    | 1.001                                    | 0.058 | GAGAGGAAGCCGCCTAAGTC       | 163               |
|                 | ZG50  | 2.596                                    | 0.186 | TGTCTCCAGCACCCAAAGAC       |                   |
| <i>GA3ox</i>    | CK    | 1.009                                    | 0.162 | CCTCAGCACTGCCGGAATTA       | 121               |
|                 | ZG50  | 12.146                                   | 1.079 | AAAGTTCATCCCGTCCACCA       |                   |
| <i>HSP20</i>    | CK    | 1.000                                    | 0.025 | CCGGTGAAGTACAGAGTTG        | 159               |
|                 | ZG50  | 0.493                                    | 0.009 | CACACGAACGATATTCAAGCG      |                   |
| <i>groEL</i>    | CK    | 1.000                                    | 0.028 | CGTGGTACGCTTTGTCTCCT       | 133               |
|                 | ZG50  | 0.173                                    | 0.015 | TGTCTTCGGTTGGTTCCTG        |                   |



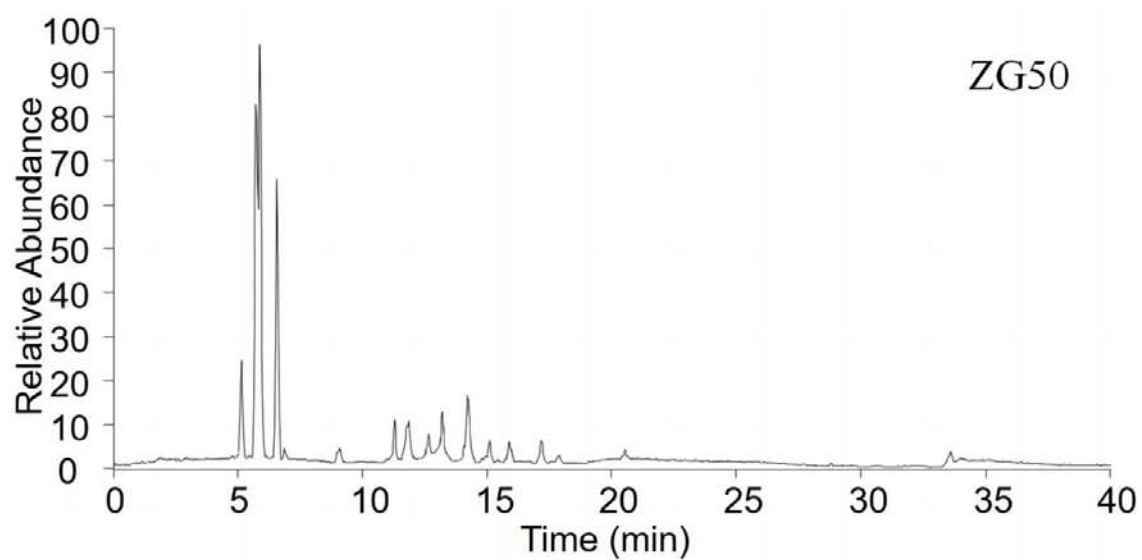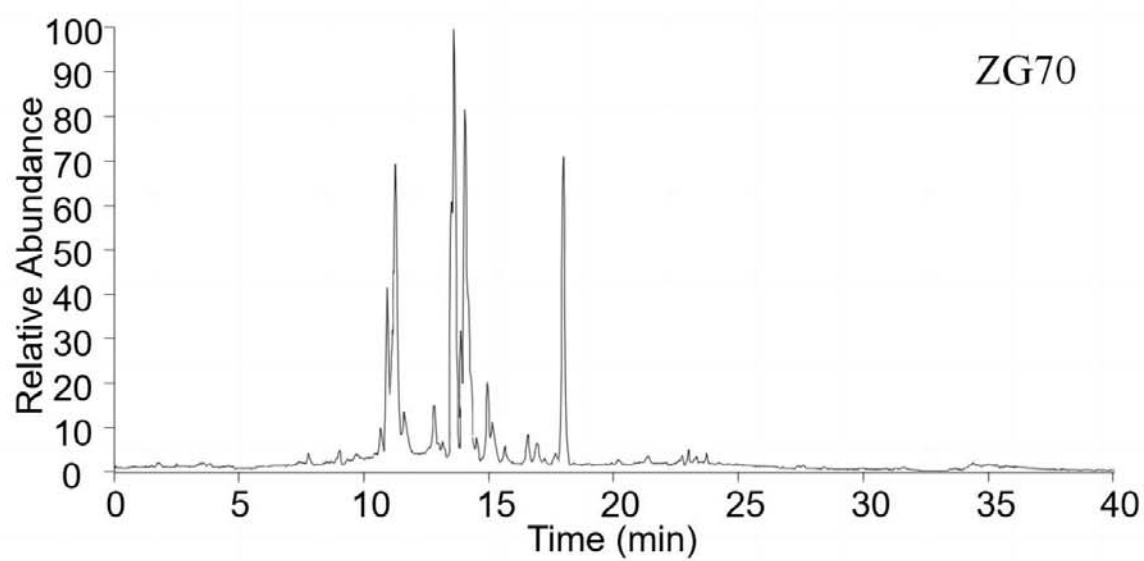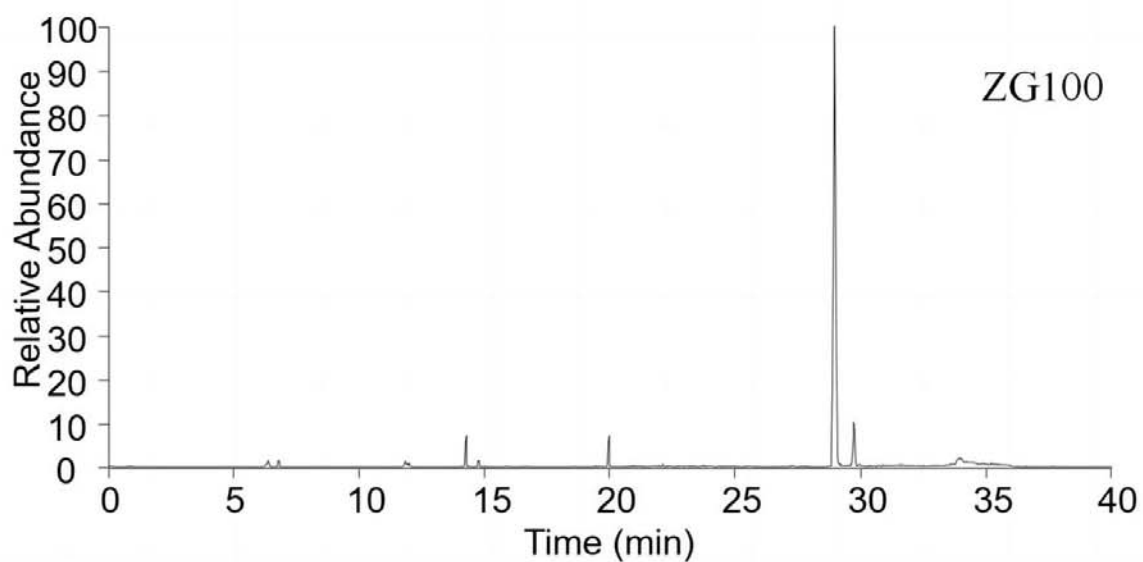

**Figure S1** Basic peak ion current chromatogram of different polarity ginsenoside components.

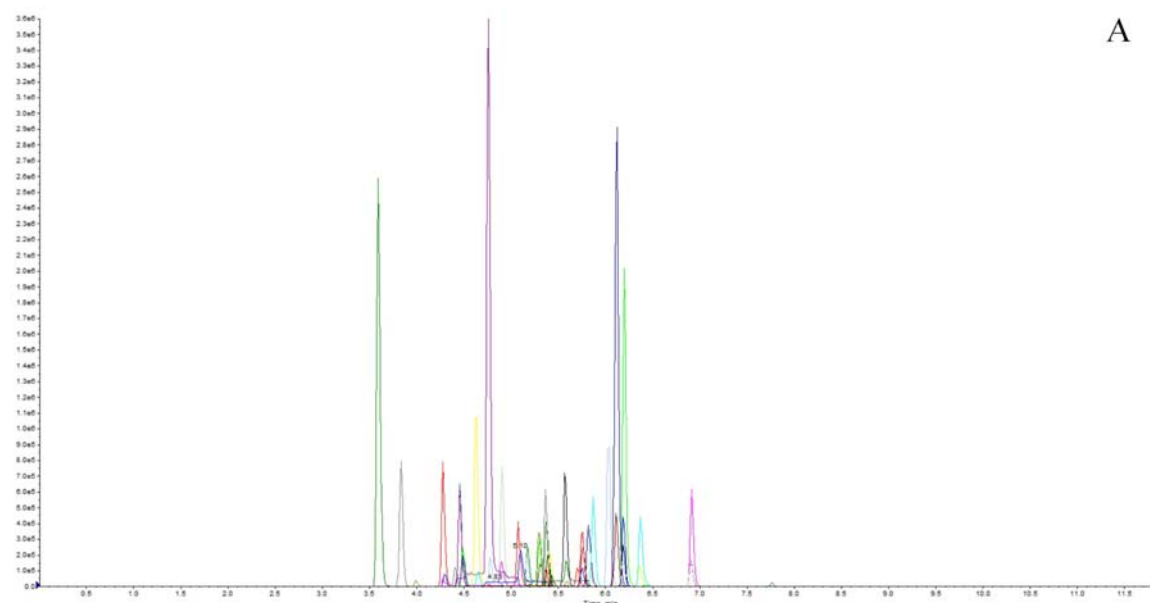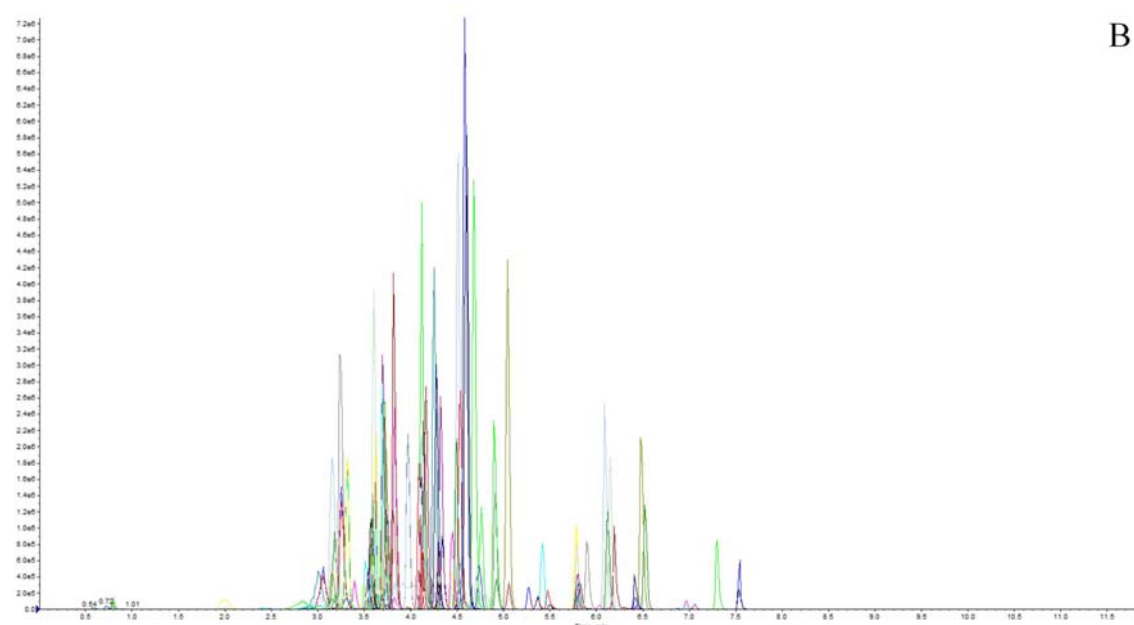

**Figure S2** The extracted ion current chromatogram of 109 endogenous phytohormones. (A) Negative ion mode. (B) Positive ion mode.

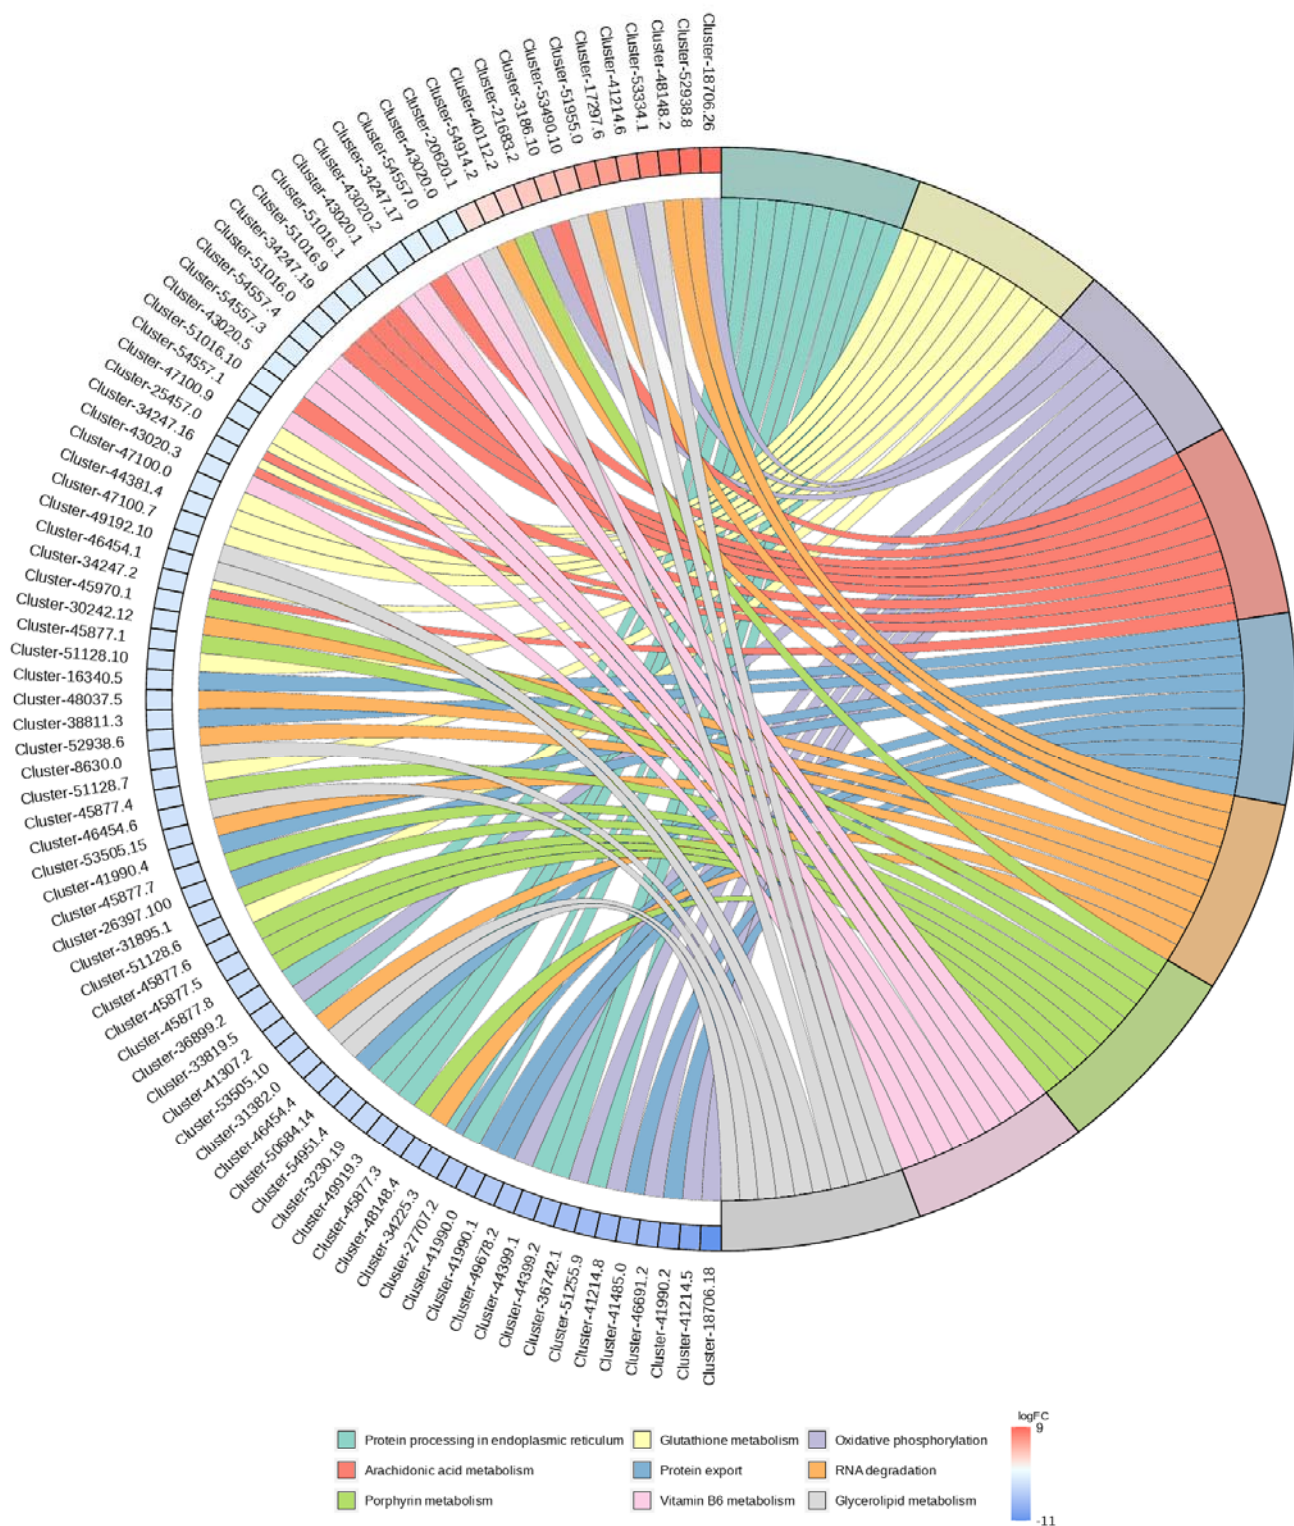

**Figure S3** Chord chart of KEGG enrichment of ZG50 VS CK group.

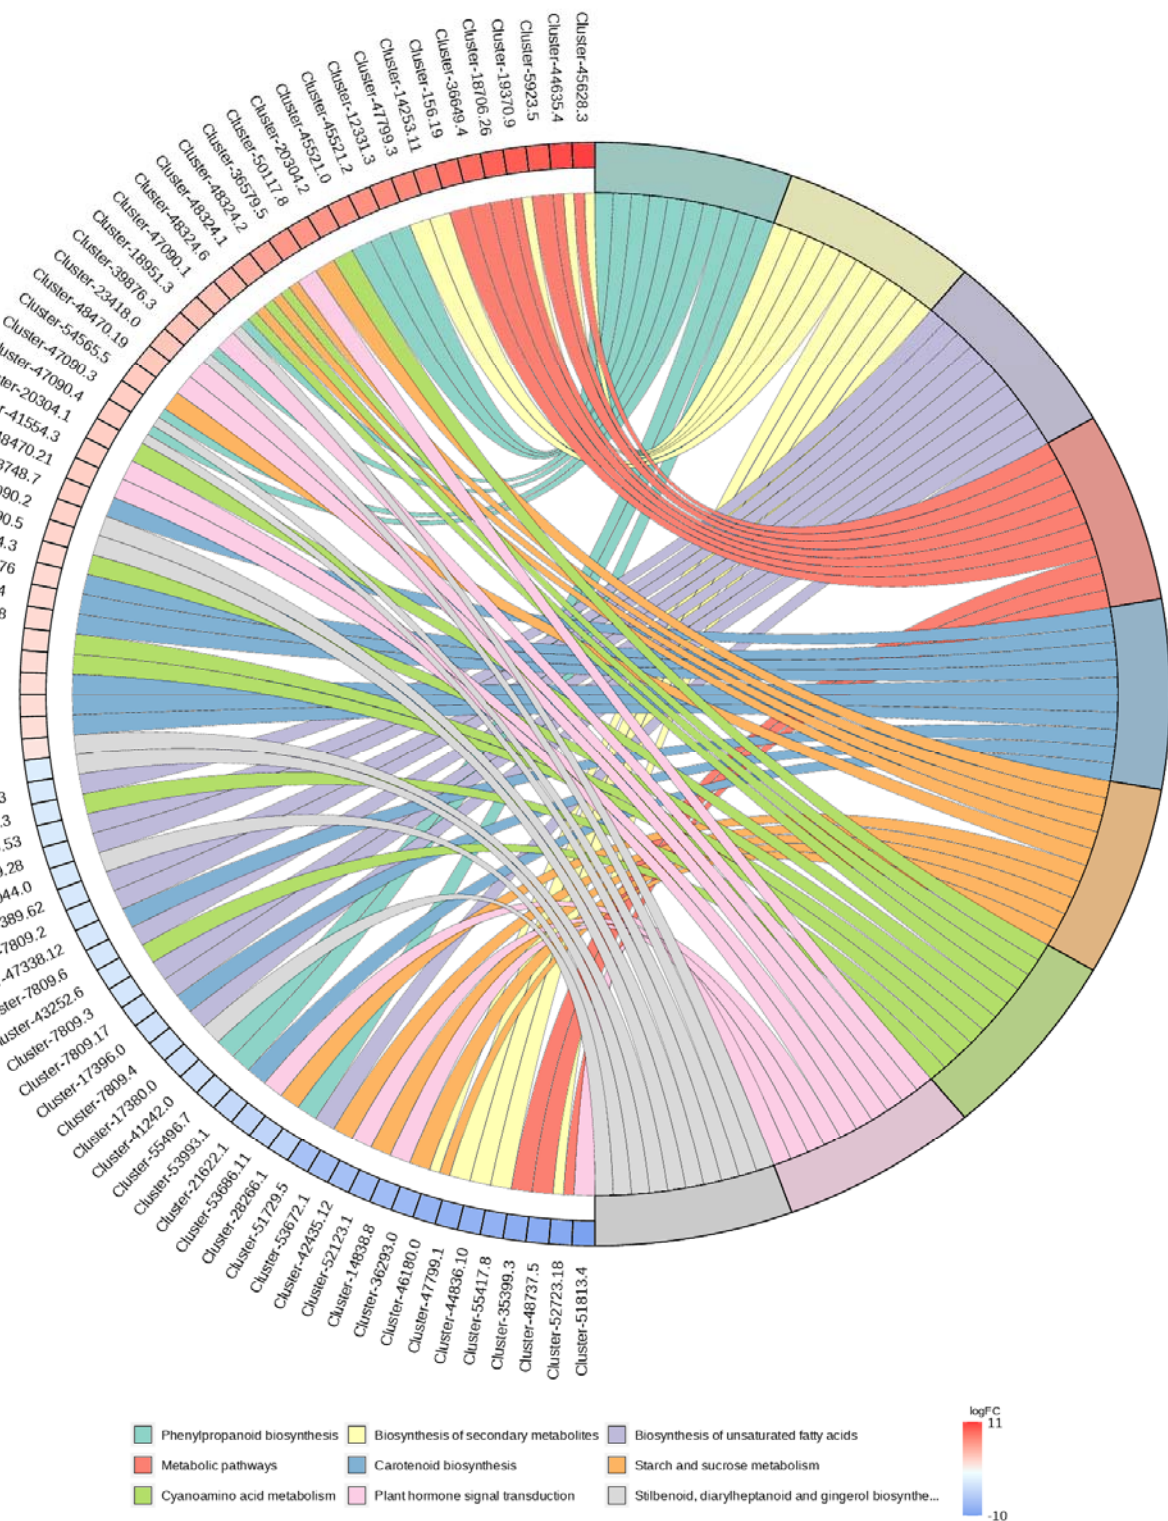

**Figure S4** Chord chart of KEGG enrichment of ZG70 VS CK group.



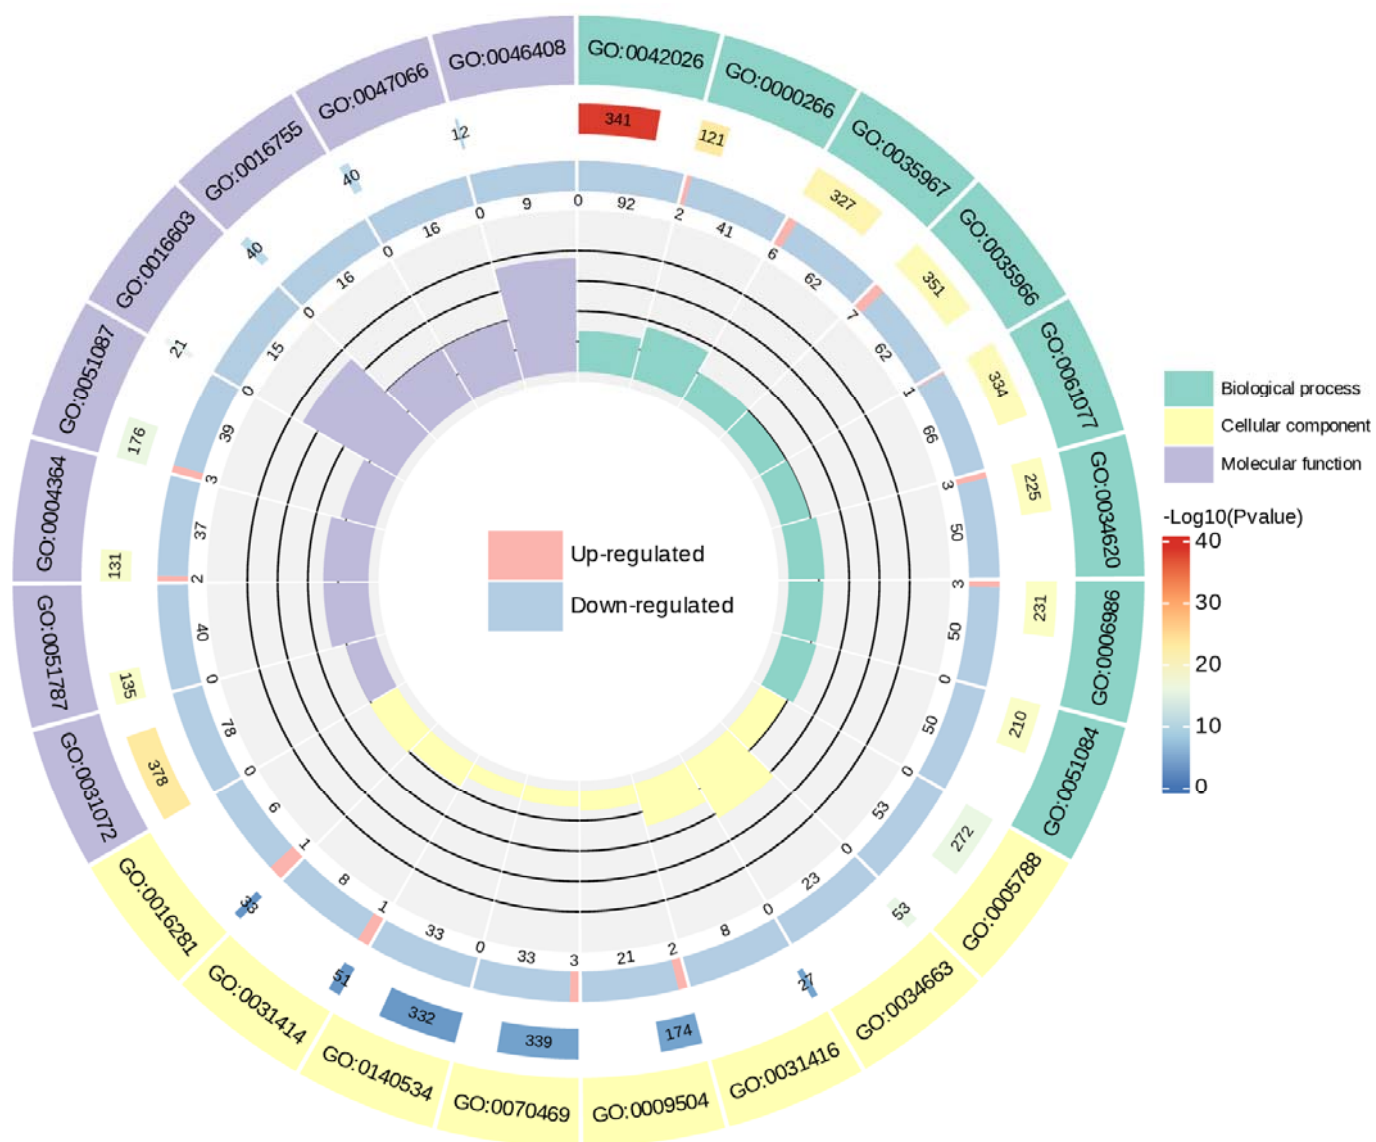

**Figure S5** Circle plot of GO enrichment of ZG50 VS CK group.

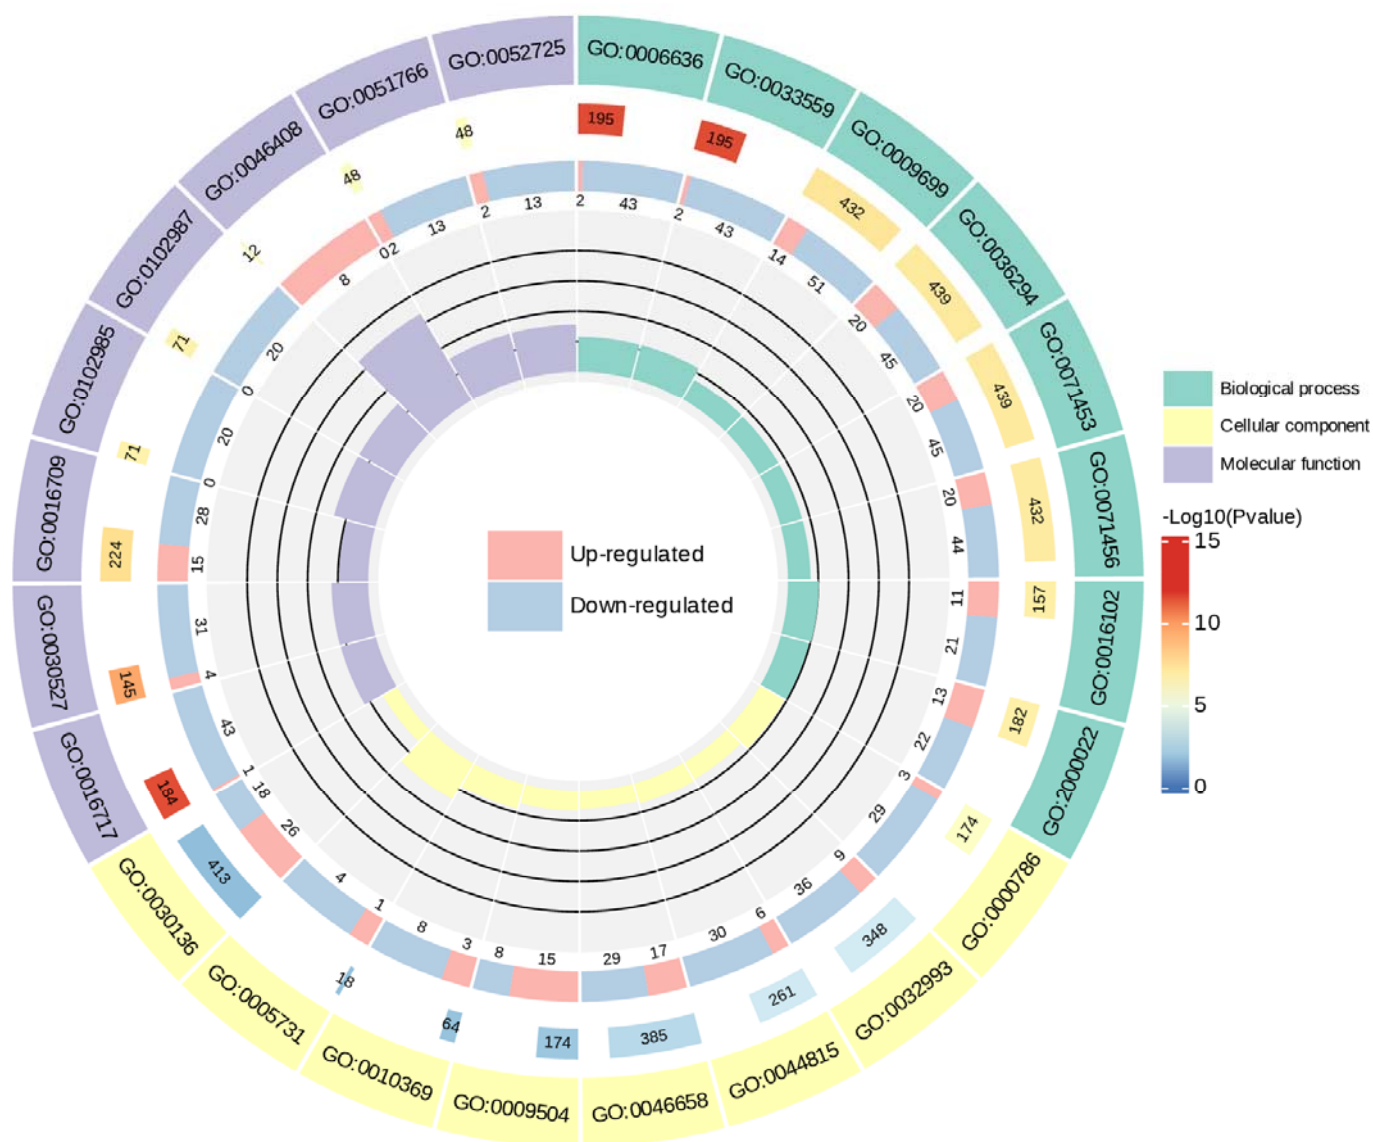

**Figure S6** Circle plot of GO enrichment of ZG70 VS CK group.
